# Supplementary material for: Resveratrol Co-Treatment Attenuates the Effects of HIV Protease Inhibitors on Rat Body Weight and Enhances Cardiac Mitochondrial Respiration
Source: PLoS One. 2017 Jan 20;12(1):e0170344. doi: 10.1371/journal.pone.0170344 (PMC5249196; doi:10.1371/journal.pone.0170344)
Supplement: S1 Data — (XLSX) [file pone.0170344.s001.xlsx]

## Sheet: Body Weights
Control
Rat weights as measured
Days	1	4	7	10	13	16	19	22	25	28	31	34	37	40	43	46	49	52	55	58	61	64	67	70	73	76	79	82	85	88	91	94	97	100	103	106	109	112	115
#1	230	239	245.3	259.2	270.8	273.7	277.2	278.9	280.7	289.2	292.2	296.2	291.7	296.7	299.1	301.4	313.6	303.6	308.6	312.7	315.8	317.1	317.4	319.6	323.3	321.9	324.9	326.4	327.9	327.9	326.1	334.2	335.4	339.7	337.2	341.2	339.9	339.5	345.3
#2	183.2	209.5	227.7	247.3	260.9	270.3	282.2	285.5	293.6	303.3	308.1	311.8	312.2	316.6	322.4	322.6	333.1	328.7	335.6	340.3	346.1	350.7	354.6	356.7	357.2	354.3	363.9	361.7	363.8	364.3	365.4	369.7	372	371.9	379.2	386.9	390.2	389.6	391.6
#3	184.9	197.3	205.2	210.7	217.9	220.2	224.8	233.1	234.7	238.3	245.7	244.5	249.5	251.7	256.7	260.1	263.7	261.9	267.7	263.6	268.2	271.7	271.1	272.7	273.3	275	281.8	278.1	283.9	278.9	283.6	282.2	281.5	285.8	286.3	293.2	290	290.1	294.7
#4	194.7	213.8	227.2	240.9	246.2	261.7	273.7	279.9	284.9	286.6	293.9	302.5	304.7	312.7	311.9	313.7	318.6	323.1	328.6	335.8	343.2	344.2	351.4	353.1	354.2	355.5	357	354.6	362.6	358.6	369.2	369.2	373.1	376.4	380.4	383.4	381.3	380.8	389.3
#5	199	216	226.4	239.7	248.2	256.7	269.9	274.5	275.4	282.4	279.7	285.9	285	291.3	295.7	301.2	305.4	313.6	320.2	327.4	326.9	328.9	330.9	335.1	339.9	338.6	344.1	339.4	346.1	340.6	342.7	343.8	352.1	347.1	356.4	361.2	362.6	362.5	371.5
#6	205.3	208.1	219.5	226	235.3	242.6	246	253.1	260.5	262.9	263.9	275.7	273.9	281.9	284	287.6	284.3	288.1	293.3	302.1	299.8	301.4	311.2	306.2	311.1	312.1	315.9	313.8	314.8	318.3	317.2	323.6	331.5	326.7	325.7	331.3	332.3	332.4	342
#7	177.7	174.7	205.2	214.3	230.7	238.4	248.1	250.4	255.4	263.4	266.5	277.2	278.6	276.9	282.1	284.2	281.9	285.6	288.4	291.3	296.5	293.2	297.9	297	299.9	307.6	305.6	307.9	308	407.3	408.4	404.5	420.2	422.1	421.9	432.7	433.3	440.3	450.9	450.2
#8	149.1	166.7	180.3	192.2	205.4	209	219.6	219.3	228.4	237.4	240.8	246.8	249.4	252.1	255.9	261.3	266.1	265.1	266.3	273.6	273.3	276.8	278.6	281.8	287.1	286.4	287.5	291	288.7	398.5	399.9	410.6	406.9	409.1	414.5	416.2	423.3	419.9	428.4	429.1
#9	161.7	191.8	187.7	195.9	203.2	203.6	210.4	209.9	214.5	215.3	221.1	224.1	226	229.2	232.4	234.9	237.2	243.2	244.6	248.5	250.6	250.3	256.6	261.7	264.8	268.7	270.2	272.2	272.2	417.4	418.5	423.8	430.4	426.1	431.1	435.5	430.4	436.2	444.7	448.3
#10	164.5	181.3	195.7	205.4	210.9	217.3	225.3	224.3	231.6	237.7	240.6	242.9	245.4	251.6	254.5	255.1	258.7	257.9	261.2	274.5	269.6	273.2	279.8	277.1	283.5	285.4	283.4	286.3	289.4	372.6	375.7	380.1	386.9	389.9	392	404.2	405.3	399.9	405.1	409.3
#11	172.5	189.2	209.8	219.3	232.8	239.1	247.1	251.7	259.9	268.7	274.3	278.1	284.1	292	291.3	294.3	295.3	297.6	299.2	305.3	309.8	316.3	318.7	321.5	327	328	325.4	332.6	334.6	384.8	384.4	384.4	390.4	388.5	390.1	405.9	404.9	404.3	408	408.6
#12	158.5	172.6	191.7	201.5	213.4	222.1	235.7	235.8	240.5	243.9	248.7	253.4	255.7	259	262.1	265.5	267.4	269.4	268.6	272.9	277.9	278.9	282.3	285	291.1	292.2	297.1	297.7	297.4	297.7	300.9	301.1	303.7	305.9	305.5	314.9	317.4	312.5	315.5	315.1
JELLY CONTROL
Rat weights as measured
Days	1	4	7	10	13	16	19	22	25	28	31	34	37	40	43	46	49	52	55	58	61	64	67	70	73	76	79	82	85	88	91	94	97	100	103	106	109	112	115
#1	190.3	204.3	223.9	240.9	250.3	257.1	264.6	272.8	277.2	282.4	294.1	293.2	293.6	294.8	298.3	303.6	311.5	315.6	320.2	316.8	317.5	319.6	323.9	326.9	337.1	338.6	337.9	339.1	339.7	339.8	340.4	347.5	349.9	351.7	353.3	356.4	355.5	354.6	364.7
#2	192.6	215.6	229.1	239.4	247.8	254.7	260.6	267.1	272.3	275.1	278.9	284.7	283.6	289.9	290.5	300.8	304.9	307.5	314.9	314.6	316.5	321.3	326.6	328.1	333.9	332.2	337.1	336.8	335.4	337.5	343.4	348.1	348.5	350	349.6	354.3	354.4	353.1	355.9
#3	237	244.4	253.6	267.8	276.3	278.4	284.4	291.5	298.3	306.3	317	317.4	322.8	323.5	328.5	333.7	340.4	336.9	350.9	349.9	353.8	355.6	356.4	359.3	363.1	366.6	364.8	370.6	369.7	367.4	368.6	375	381	377.4	384.3	387.3	383.7	386.2	397.5
#4	206.4	222.4	240.3	262	277.8	287.1	299.1	312.4	316	330.1	338	331.6	340.5	345.9	351.8	353.6	354.6	358.2	367.5	377.4	376.3	376.1	381.9	388.7	395.2	396.3	401.3	405.6	406.9	410.5	409.7	416.3	415.6	424.5	433.2	437.5	435.1	439.8	445.6
#5	205.2	210	224.3	236.2	243.5	247.8	255.3	260.7	265.1	273.3	281.1	286.4	290.2	290.3	295.3	300.8	307.4	307.6	309.2	312.7	317.9	319.3	325.5	328.1	329	331.5	333.4	335.4	337.9	341.8	345.6	344.7	349.8	349.9	355.9	354.7	359.3	356.3	359.6
#6	180.4	193	203.1	209.4	220	218.8	225.9	230.1	232.2	240.7	240.3	243.5	243.4	243.5	245.6	249.4	252.8	252	256.8	256.8	255.4	257.6	261.3	264.4	267.6	266.1	268	267.8	268.2	271.1	271.8	271.2	272.6	274.2	276.8	280.8	278.7	279.6	279.8
#7	176.5	178.8	194.8	208.8	220.4	233.6	238.9	243.1	251.1	262.5	264.8	272.3	275.5	279.4	282.6	289.7	297.1	296.6	297.8	305.9	302.9	308.7	315.5	315.4	319.1	321.5	325.5	331.6	333.7	349.3	355.2	354.3	362.9	359.4	355.6	370.5	375.8	371.2	380.7	382.4
#8	180.5	186.3	184.7	201.9	212.4	222.2	230.1	236.4	245.8	254.8	262.2	266.4	272.2	273.3	284.8	285.2	291.5	289.9	294.3	294	305.1	303	310.6	313.5	314.8	318.1	323.3	329.5	327	398.4	403.2	399.6	406.8	407.3	402.9	419.1	416.7	417.7	422.3	421.4
#9	164.2	171.2	185.7	200.8	204.6	214.4	218.3	221.6	224.6	230.4	238.8	241.7	244.2	242.2	248.1	254.2	255.5	255.8	258.2	259.1	264.1	264.2	272.5	274.9	276.5	276.9	278.5	282.4	288.9	376.6	379.1	384.2	388.3	391.6	393.6	400.6	401.9	396.6	407	411
#10	162.3	175.4	187.9	199.8	207.7	228.6	232.3	236.4	240.1	247.9	252.6	256.8	261.8	271.5	271.6	274.2	277.1	280.4	283.6	289.5	289.2	293.7	297.8	300.1	303.6	308.8	309.2	311.8	315.6	370.3	376.5	380	382.2	391.9	388.1	401.7	398.1	402.6	404.1	407.5
#11	162.5	178	194.1	207.2	218.3	214.6	219	222	227.5	234.2	238.4	244.8	246.9	251.7	250.9	259	257.4	258.8	262.7	264.9	266.6	270.2	273.3	275.9	278.8	281	281	283.9	288.7	409.7	411.9	410.1	417.2	416.7	423.2	431.1	432.6	431.4	436.1	440.7
#12	154.4	168.3	184.1	199.4	209	223.5	232.1	240.6	248.3	260.1	262.5	272.6	275.8	281.5	284.3	290.2	295.7	297.8	301.5	304.1	309.7	305.5	314.9	315.6	317.9	324.7	327	329.1	328.5	376.1	380.7	386.1	391.1	395.3	396.7	407.3	402.6	410.7	412.7	410.8
PI Control
Rat weights as measured
Days	1	4	7	10	13	16	19	22	25	28	31	34	37	40	43	46	49	52	55	58	61	64	67	70	73	76	79	82	85	88	91	94	97	100	103	106	109	112	115
#1	235.3	243.3	255.1	263.5	267.4	276.5	276.7	280.9	288.4	292.4	296.8	297.7	295.5	299.8	305.1	309.4	313.7	317.6	317.2	319.3	319.4	325.4	327.3	327.6	326.8	327.8	327.5	331.7	332.6	331.8	334.7	333.8	339.3	339.9	341.2	344.2	348.7	351.2	352.5
#2	208	233.2	246.8	249.4	255.9	262.3	265.8	272.2	277.6	282.6	287.3	289.6	287.9	291.7	299.5	307.1	309.6	307.9	310.9	311.4	320.1	320.1	320.6	322.2	321.8	325.4	331.6	331.2	332.3	334.4	335.6	337.9	338.3	341	340.4	338.3	342.9	344.6	355
#3	204.4	217.6	231.9	246.9	263.5	274.4	280.1	295.9	299.9	304.3	313.1	315.8	314.6	321.8	323.7	328.2	336.4	332.9	340.8	346.5	349.9	354	355.2	358.1	354.9	361.8	366.4	370.7	375.6	376.1	378.1	380.4	383.1	388.4	391.8	397.3	398.1	397.2	406.1
#4	186.1	200.4	212.3	224.2	225.9	231.3	237.1	240.2	242.5	250.4	256.1	254.4	253.3	255.1	259.4	261.7	267.5	268.4	268.7	266.7	269.8	271.9	275.3	273.9	279.5	279.7	280.8	283.1	283.3	286.58	287.6	288.1	291.7	289.5	297.2	293.1	296.6	298.6	304.6
#5	185	201.7	219.2	226.9	235	239.7	242.2	247.8	249.9	253.2	257.1	260.1	258.7	263.3	260.8	264	272.7	272.6	269.9	270.6	274.5	275.2	276.8	274.1	278.8	278.8	278.9	280.6	284.3	286	283.9	281.4	289.6	290.9	293.4	288.7	293.2	295.1	297.1
#6	220.5	236	246.5	258.2	261.7	265.7	274.3	283.5	287.7	301.9	298.7	307.6	310.5	314.5	318.1	318.4	326.1	330.8	329.8	327.8	339.1	339.4	345.8	343.8	351.6	352.2	349.6	350	353.1	355.4	352.8	354.6	359.3	361.3	368.6	365.7	364.2	368.2	368.3
#7	163.1	201.6	217.3	233.6	258.8	274.2	291.6	279.8	293.6	303.6	315.1	328.2	332.2	339.6	335.8	338.6	344.6	345.4	356.9	361.2	357.8	361.2	364.3	365.6	366.8	373.1	377.7	380.1	385.9	324	327.9	330.7	333.9	333.2	335.2	348.4	349.1	348.6	358.1	356.1
#8	150.6	200.1	212.4	224.5	236.5	239.9	244.4	240	253.1	263.6	266.7	265.6	267.7	275.3	277.5	282.7	282.7	282.7	285.4	285.7	295.3	299.1	300.8	301.2	298.6	306.7	306.1	317	317.9	341.1	342.9	348.1	345.4	350.7	358.9	369.3	366.2	365.4	372.7	371.4
#9	155.2	182.2	196.1	211.7	224.1	230.6	241.8	236.1	248.7	256.2	258.9	263	266.9	268.7	271.3	274.6	278.9	280.9	281.6	282.4	283	293.6	294	297.4	299.2	298.1	300.4	300.8	303.5	342.6	350.1	354.4	356.7	352.4	355.3	365.6	361.4	366.6	371.9	367.7
#10	165.7	186.5	207.5	225.3	241.1	255.4	266.7	268.1	280.7	292.6	304.1	308.8	313.1	322.6	323.4	333.2	337.8	342.3	346.8	350.6	356.4	362.3	370.2	370.5	376.3	377.5	386.5	391.7	393.6	363.6	367.2	365.4	370.3	373.2	372.3	379.6	383.7	385.7	386.3	388
#11	155.3	174.6	190.2	200	210	217.2	221.6	223.4	232.9	238.4	245.3	247.9	251.9	250.3	257.5	265.9	262.9	262.3	265.2	268	269.6	270.9	275.5	277.9	288.4	285.9	288.6	292.4	294.8	339.4	340.2	338.5	342.4	348.4	345.7	350.3	351.4	358.5	363.2	362.3
#12	160.2	176.9	185.1	204.2	212.3	220.9	228.1	226.3	235.8	244.8	249.1	252.4	258.4	255.3	260.3	268.9	275.3	273.9	278.8	279.8	286	290.3	294.6	298.4	296.1	298.9	300.1	308.4	307.6	305.7	305.7	304.1	306.7	305.8	306.1	313.2	313.9	316.9	316.9	314.8
PI+RSV
Rat weights as measured
Days	1	4	7	10	13	16	19	22	25	28	31	34	37	40	43	46	49	52	55	58	61	64	67	70	73	76	79	82	85	88	91	94	97	100	103	106	109	112	115
#1	189.6	206.8	217.1	234.7	238.5	250.5	259	260.4	264.8	273.8	270.8	274.6	277.2	281.7	291.2	294.1	296.8	295.6	301.3	306.6	315.1	314.1	319.8	321.6	327	329.9	335.3	339.3	339.8	339	344.4	350.4	356.9	355.6	359.4	358.1	362.2	366.1	373.8
#2	233.9	234.4	243.4	261.1	264.1	265.1	274.9	282.6	291.4	291.6	293.9	294.2	300	298.7	307.9	309.6	318	319.3	319.6	321.6	327.9	331.8	330.1	332.3	334.7	334.4	341.3	338.5	342.1	344.2	354.4	350.1	355.8	354.7	357.1	356.9	357.2	363.1	362.6
#3	190.1	224.8	243.6	263.3	279.9	289.4	299.3	308	317.6	328.1	334.2	337.2	342.6	348.4	357.9	355.4	361.9	363.9	366	368.9	374.3	383.7	384.1	378.1	386.4	394.6	396.6	404.8	402.3	405.7	415.2	415.4	418.5	416.8	423.3	428.3	422.8	428.6	435.8
#4	196	220.7	235.1	253.5	261	275.3	280.5	288.5	294.1	299.4	306.9	307.7	312.4	321.8	326.4	329.1	334.6	341.2	347.7	352.1	356.9	360.8	370.2	370.9	378.6	379.2	381.2	381.8	387.3	390.3	392.3	397.1	398.3	400.9	406.1	409.9	408.1	411.8	413.6
#5	185.1	215.4	228.5	240.6	259.2	275.2	283.2	295.7	298.1	303.2	307.4	311.4	315.8	320.6	328.9	331.9	336.4	342.5	346.8	349.9	358.3	368.6	371.5	379	381.5	384.9	384.4	388.7	394.9	401.1	398.6	405.1	413.7	419.2	423.1	428.3	434.8	435.5	441.5
#6	198.4	200.8	208.1	219	224.4	228.2	230.5	235.6	237.2	242.7	246.3	246.7	247.6	251.3	252.3	250.3	258.3	259.4	259.3	260.1	263.1	266.4	266.6	267.1	270.6	271.7	273.6	273.4	275.5	271.8	275.6	278.8	280.4	283.5	287.2	288.2	289.3	291.1	291.3
#7	168.6	192.8	204.3	220.6	237.9	244.9	249.9	257.9	261.6	268.1	274.3	278.2	281.2	280.4	283	286.4	290.7	295.8	296.3	300.6	303.4	305.9	312.5	320.6	323.7	323.7	326	326.8	326.3	348.2	349.5	353.2	355.9	355.9	361.4	362.7	361.9	369.7	369.6	374.6
#8	158.6	174.5	187.1	198.5	207.2	215.3	225.3	226.9	229.1	238.3	243.2	251.6	252.9	253.7	260.4	264.9	266.3	270.5	267.5	271.2	273.7	276.8	281.6	292.3	288.7	287.2	288.8	289.4	297	275.8	277.8	282.2	284.5	285.6	289.2	293.4	295	299.2	301.5	303.6
#9	162.9	181.9	197.4	209.3	219.9	227.8	239.4	245.9	248.8	252.9	262.3	265.4	268.3	274.9	276.4	279.6	283.6	284.6	289.3	291.5	291.6	293.5	297.2	298.5	305	303.5	309.1	312.1	312.2	424.5	428.6	430.3	436.3	437.2	437.3	449.6	444.2	442.8	453.7	458.9
#10	177.1	188.5	201.8	208.7	220.7	232.6	237.2	240	246.5	253.1	263.8	267.4	274.2	279	286.1	285.9	290.5	295.4	300.3	306.8	316.3	311.3	317.1	319.2	323	332.7	332.4	332.5	335.5	302.1	303.5	303.2	302.7	305.4	303.5	307.1	311.3	308.4	316.4	313
#11	157.3	169.7	180	190.4	196.5	206.8	211.3	215.1	219.6	232.1	237.9	237.1	239.6	243.3	251.6	255.9	258.4	257.2	261.2	262.9	268	273.8	277	278.4	280.5	283.4	289.2	290.7	292.5	342.7	346.2	350.7	348.3	353	352.9	355.3	356.2	357.2	354.1	361.6
#12	169.2	191.4	196.5	209.1	223.1	231.5	235.3	237.5	245.8	254.9	262.5	262.6	264.8	270.6	280.1	282.5	287.4	289.2	291.4	292.8	299.6	304.4	303.1	304.1	307.4	310.9	320.4	319.1	321.4	356.4	359.9	361.1	363.7	371	372.4	377.6	381.7	379.5	381.8	383.8
PI+ASP
Rat weights as measured
Days	1	4	7	10	13	16	19	22	25	28	31	34	37	40	43	46	49	52	55	58	61	64	67	70	73	76	79	82	85	88	91	94	97	100	103	106	109	112	115
#1	216.8	232.5	253.7	270.9	282.6	287.3	292.5	296.5	302.1	312.3	319.6	319.4	322.6	326.2	334.9	337.1	345.3	347.3	355.8	365.2	356.6	355.1	367.9	371.3	367.2	369	376.9	375.3	377.4	383.7	380.6	383.5	386	389.8	393.8	399.6	404.2	398.9	406
#2	214.6	230.5	254.3	269.2	287.4	297.4	304.4	317.2	324.4	318.4	324.3	334.4	337.8	339.8	340.6	347.9	354.1	356.2	363.8	364.7	366.1	372.6	379.6	385.5	386.8	386.2	388	385	396.1	394.5	397.1	403.3	405.4	407.4	411.2	418.7	416.1	427.5	429.1
#3	194.3	195.6	208.4	217.5	226.8	229.6	236.4	241.8	246.2	248.5	251.2	251	256.1	262.7	267.5	273.4	276.5	276.9	280.1	280.6	281.8	290.4	293.3	295.5	296.1	297.1	300.1	300.5	305.9	309.7	311.3	311	316.1	317	320.9	324.9	327.6	327.8	334.4
#4	190.1	200.2	219.5	230.6	247.3	258.1	264.9	271.9	276.8	281.2	287.6	290.6	294.9	298.1	305.8	310.3	316.7	313.7	318	320.2	325.2	329.1	335.3	338.7	338.4	344.6	345.6	349.1	352.5	352.5	355	364.5	366.1	363.9	368.1	368.1	371.5	376.7	377.4
#5	203.7	217.9	232.4	243.4	256.6	268	274.7	279.2	287.3	289.2	293.3	293.7	297.4	297.6	303.2	310.4	317.8	318	325.2	328.1	334	335.4	340.3	345.7	349.3	348.1	350.1	351.3	357.3	357.2	362.2	364.4	369.4	365.8	367.8	372.3	373.8	381.5	378.8
#6	215.1	229.2	250.3	257	276.4	287.8	293.8	299.6	305.5	310	315.8	323.4	329.6	332.1	337.4	345.3	342.4	348.1	352.4	350.4	358.2	359.3	360.6	366.5	369.5	372.2	366	370.2	371.8	379.4	379.4	384.1	387.4	389.6	390.7	394.6	394.1	399.2	403.8
#7	175.1	194.4	210.7	231.8	248.9	259.9	271.4	274.3	281.4	299.3	307.4	312.9	312.9	311.2	325.1	335.7	340.7	342.5	341.2	346.9	352	360.1	368.1	369.3	370.7	373.2	376.3	375.8	394.1	298.2	300.4	305.2	302.3	305.8	306.3	310.9	315.5	317.6	320.6	324.1
#8	156.7	168	180.8	190.9	200.9	206.6	210.4	208.8	214.6	223	229.8	227.7	231.7	231.4	239.7	246.5	247.7	248.1	246.7	246.5	253.4	257.2	263.9	263.1	264.2	266.2	268.2	268.2	277.1	309.7	309.5	309.6	316.4	313.5	316.4	323.5	325.9	329.7	327.7	334.9
#9	169.6	185.9	202.5	211.9	222.5	228.7	234.1	240	248.3	257.3	262.2	268.8	271.7	272.2	277.4	281.7	283.8	284	284.2	287.3	292.4	296.5	300.6	303.7	305.8	307.2	309.6	307.7	314.3	305.6	309.8	311.6	312.9	311.6	315.1	318.9	323.4	320.5	324.5	325.4
#10	172.2	193.8	203.9	220.1	229.6	237.9	244.9	250.5	255.2	263.1	271.4	276.9	275.2	278.9	280	282.4	288.9	289.4	287.1	288.1	292.6	303.8	302.3	300.1	302.4	307.4	308.2	313.1	316.4	378.3	379.8	385.1	386.3	391.7	390.5	399.5	405.8	403.2	410.6	414
#11	165.7	182	194.5	205.1	216.6	230.1	230.5	235.6	236.9	240.4	251.4	253.6	255.3	256.3	259.1	266.7	272.6	275.7	270.1	271.4	274.4	281.2	280.7	288.7	287.9	289.7	296.3	298.1	297	288.9	288.3	288	292.7	294.3	293.1	302.1	307.1	308.1	311.2	312.9
#12	159.7	175.9	190	202.3	207.7	215.5	222.9	227.5	234.6	236.4	241.5	251.9	253	256.6	259.5	259.9	264.5	266.2	265.4	270.6	274.6	277.1	280.3	281.4	284.6	286.5	289.5	290.3	287.5	296.5	304.1	303.4	306.9	306.4	305.4	311.6	312.9	307.4	311.5	316.4
PI+Vit-C
Rat weights as measured
Days	1	4	7	10	13	16	19	22	25	28	31	34	37	40	43	46	49	52	55	58	61	64	67	70	73	76	79	82	85	88	91	94	97	100	103	106	109	112	115
#1	192.5	213.1	229.1	248.1	249.8	261.8	265.9	277.4	288.7	288.9	304.5	301.2	307.1	305.8	310.5	320.9	322.7	331.2	327.7	329.8	333.1	341	348.7	354.8	355.9	353.1	353.2	351.1	356.8	358.9	368.1	368.3	367.7	368.5	368.5	368.5	374.2	378.7	383.7
#2	189.2	212.8	235.8	246.1	257.9	266.1	268.3	278.2	283.2	288.7	296.9	292.9	294.1	295.1	293.6	302.1	301.4	306.2	310.1	307.6	313.5	321.1	324.4	324.7	327.3	327.3	329.9	329.8	331.1	331.2	336.4	335.8	338.2	344.2	346	347.7	340.7	350.2	355.1
#3	184.1	201.8	226.3	237.7	242.7	249.8	259	262.7	271.8	279.3	283.7	289.1	294.6	301.1	301.4	308.5	320.9	322.7	327.2	325.2	335.1	333.7	340.3	343.1	342.3	348.9	348	345	349.9	357.7	357.4	365.5	365.4	368.4	361.9	367.4	373.8	375.8	379.6
#4	196.5	228.5	250	265.4	277.2	276.8	280.9	280.2	282.9	286.5	293.1	300.8	299.2	300.2	303.1	308.4	315.8	321.9	333.3	334.6	337.5	338.1	343.1	345.2	353.1	359	356.9	356.8	359.9	357.1	363.7	369.4	376.4	374.2	371.1	371.3	373.1	380.6	387.1
#5	198.5	209.7	233.2	250	261.2	272.2	267.4	287.6	294.8	307	318	314.4	320.6	324.8	333.3	337.9	346.1	351.3	354.9	361.6	365.7	375.2	381.8	391.2	394.8	395.2	394.8	395.3	402.1	409.8	411.4	415.2	419.2	419.8	425.8	428.4	426.1	432	434.5
#6	208	208.7	234.3	264.1	275.7	283.3	286.7	295.6	299.7	310.7	318.6	315.4	316	327.9	329.4	335.4	340.6	348.2	355.6	352.7	354.7	362.3	366.5	363.4	369.9	371.5	369.6	370.6	376.2	377.3	382.2	383.9	394.3	393.1	392.2	399.2	395.2	402.4	405.4
#7	163.9	178.3	192.3	202.7	209.7	209.3	215.1	216.5	218.7	231.4	237.5	242.4	243.2	247.2	252.4	256.3	260.7	263.2	264.8	266.1	268.5	275	277.2	281.2	286.6	285.3	290.8	292.8	292.6	344.7	341.6	344.6	348.2	346.7	347.3	350.5	348.6	356.2	362.4	357.5
#8	169.8	184	201.6	215.9	229.5	243.7	256.2	261.4	268.7	273.9	282.4	287.3	293.8	295.8	299.3	301.4	306.8	306.1	312	313.7	313.1	320	321.6	325.3	328.9	330.1	331.9	337.2	339.4	362.5	363.9	365.1	364.6	366.6	366.1	370.6	372.1	374.5	378.8	377.5
#9	153.2	166.4	180.7	192.4	199.1	207.2	218.9	220.2	224.6	231.6	238.2	242.7	243.7	246.6	248.7	251.7	257.3	260	264.6	263.2	266.4	269.7	272.1	271.9	274.1	275.2	278.9	280.2	279.8	353.7	352.2	353.3	360.2	363.3	365.1	369.5	370.2	377.3	385.6	391.9
#10	158.4	174.2	187	198.4	207.2	216.2	221.3	230.8	233.9	243.2	247.3	251.8	257.3	258.5	260.6	262.7	268.6	273.5	275.2	277.2	279.6	282.1	286.4	290.1	294.1	298.3	299.3	299.5	301.8	382.3	385.4	390.8	386	387.4	391.4	396.1	401.6	400.9	406.6	409.6
#11	168.2	183.7	198.1	209.6	218.9	225.6	236.3	238.3	241.7	247	251.7	260.9	266.1	268.2	268.4	271.4	276.9	285.2	284.6	286.6	290.7	294.6	300	307.3	309.8	312.9	311.4	318.6	322.6	373.8	375.5	372.2	374.6	381.6	381.6	387.1	389.6	393.7	402.7	402.3
#12	156.8	175	191.6	211.3	225.6	242.1	255.3	260.7	266.1	272.8	279.3	290.1	294.8	294.9	301.9	301.2	307.8	315.6	319.6	318.2	322.4	326.6	336.8	340.3	342.3	346.2	345.9	347.8	351.9	340.1	340.1	344.2	342.7	350.5	348.7	352.5	353.1	358.1	362.2	361.8
