# Supplementary material for: Resveratrol Co-Treatment Attenuates the Effects of HIV Protease Inhibitors on Rat Body Weight and Enhances Cardiac Mitochondrial Respiration
Source: PLoS One. 2017 Jan 20;12(1):e0170344. doi: 10.1371/journal.pone.0170344 (PMC5249196; doi:10.1371/journal.pone.0170344)
Supplement: S2 Data — (XLSX) [file pone.0170344.s002.xlsx]

## Sheet: Harvest data 4 month
	Control
	Rat number	Body weight	Heart weight	Liver weight	Right ventricel	Left ventricel	Testicular fat	Retraperitoneal fat	Muscle	Tibia length	BW/TL	HW/TL	LW/TL	HW/BW	LW/BW	HW/TL	LW/TL	RV/HW	LV/HW	TF/TL	RF/TL	M/TL
	1	423.41	1.116	13.009	-	-	-	-	-	43	9.84674	0.0259535	0.302535	0.00263574	0.0307244	0.0259535	0.302535	-	-	-	-	-
	2	368.49	0.806	9.086	-	-	-	-	-	41.5	8.87928	0.0194217	0.21894	0.0021873	0.0246574	0.0194217	0.21894	-	-	-	-	-
	3	312.7	0.719	8.623	-	-	-	-	-	41	7.62683	0.0175366	0.210317	0.00229933	0.027576	0.0175366	0.210317	-	-	-	-	-
	4	401.49	0.926	11.596	-	-	-	-	-	42	9.55929	0.0220476	0.276095	0.00230641	0.0288824	0.0220476	0.276095	-	-	-	-	-
	5	386.57	0.965	10.676	-	-	-	-	-	43.5	8.88667	0.0221839	0.245425	0.00249631	0.0276172	0.0221839	0.245425	-	-	-	-	-
	6	348.37	1.038	10.22	-	-	-	-	-	38	9.16763	0.0273158	0.268947	0.00297959	0.0293366	0.0273158	0.268947	-	-	-	-	-
	7	450.2	0.9637	14.04	0.2008	0.7629	11.3963	7.6851	1.0036	43	10.4698	0.0224116	0.326512	0.0021406	0.0311861	0.0224116	0.326512	0.00466977	0.0177419	0.26503	0.178723	0.0233395
	8	429.1	1.0777	13.904	0.2279	0.8498	6.8892	4.0436	1.1176	44	9.75227	0.0244932	0.316	0.00251154	0.0324027	0.0244932	0.316	0.00517955	0.0193136	0.156573	0.0919	0.0254
	9	448.3	0.957	14.7304	0.186	0.771	7.6835	4.1355	1.1807	43	10.4256	0.0222558	0.342567	0.00213473	0.0328584	0.0222558	0.342567	0.00432558	0.0179302	0.178686	0.0961744	0.0274581
	10	315.1	0.6799	9.1899	0.1329	0.547	5.98	2.8096	0.7923	40	7.8775	0.0169975	0.229747	0.00215773	0.029165	0.0169975	0.229747	0.0033225	0.013675	0.1495	0.07024	0.0198075
	11	409.3	0.8888	12.5607	0.1796	0.7092	6.6192	3.6483	1.0262	43	9.5186	0.0206698	0.292109	0.00217151	0.0306882	0.0206698	0.292109	0.00417674	0.016493	0.153935	0.0848442	0.0238651
	12	408.6	0.8888	14.3783	0.1975	0.6913	11.9383	7.8442	0.836	43	9.50233	0.0206698	0.334379	0.00217523	0.0351892	0.0206698	0.334379	0.00459302	0.0160767	0.277635	0.182423	0.0194419
	Jelly
	Rat number	Body weight	Heart weight	Liver weight	Right ventricel	Left ventricel	Testicular fat	Retraperitoneal fat	Muscle	Tibia length	BW/TL	HW/TL	LW/TL	HW/BW	LW/BW	HW/TL	LW/TL	RV/HW	LV/HW	TF/TL	RF/TL	M/TL
	1	369.28	0.954	13.254	-	-	-	-	-	42.5	8.68894	0.0224471	0.311859	0.00258341	0.0358915	0.0224471	0.311859	-	-	-	-	-
	2	350.85	0.837	12.127	-	-	-	-	-	42	8.35357	0.0199286	0.288738	0.00238563	0.0345646	0.0199286	0.288738	-	-	-	-	-
	3	395.3	1.112	10.464	-	-	-	-	-	42	9.4119	0.0264762	0.249143	0.00281305	0.026471	0.0264762	0.249143	-	-	-	-	-
	4	449.33	1.076	10.24	-	-	-	-	-	42	10.6983	0.025619	0.24381	0.00239468	0.0227895	0.025619	0.24381	-	-	-	-	-
	5	365.54	0.905	11.003	-	-	-	-	-	42.5	8.60094	0.0212941	0.258894	0.00247579	0.0301007	0.0212941	0.258894	-	-	-	-	-
	6	299.75	0.713	8.737	-	-	-	-	-	42	7.1369	0.0169762	0.208024	0.00237865	0.0291476	0.0169762	0.208024	-	-	-	-	-
	7	382.4	0.819	10.7326	0.1561	0.6629	8.6845	5.006	0.8975	43	8.89302	0.0190465	0.249595	0.00214174	0.0280664	0.0190465	0.249595	0.00363023	0.0154163	0.201965	0.116419	0.0208721
	8	421.4	0.9226	12.9455	0.1633	0.7593	7.208	4.4783	0.968	43	9.8	0.0214558	0.301058	0.00218937	0.0307202	0.0214558	0.301058	0.00379767	0.0176581	0.167628	0.104147	0.0225116
	9	411	1.0546	14.6168	0.1902	0.8644	6.8128	3.2114	1.0565	43	9.55814	0.0245256	0.339926	0.00256594	0.035564	0.0245256	0.339926	0.00442326	0.0201023	0.158437	0.0746837	0.0245698
	10	407.5	0.9677	12.5064	0.1951	0.7726	9.8148	5.3719	1.0964	43	9.47674	0.0225047	0.290847	0.00237472	0.0306906	0.0225047	0.290847	0.00453721	0.0179674	0.228251	0.124928	0.0254977
	11	410.8	0.8896	11.937	0.1553	0.7343	8.6677	6.934	1.0178	44	9.33636	0.0202182	0.271295	0.00216553	0.0290579	0.0202182	0.271295	0.00352955	0.0166886	0.196993	0.157591	0.0231318
	12	440.7	0.8936	13.7446	0.1539	0.7397	9.386	8.996	1.0535	45	9.79333	0.0198578	0.305436	0.00202768	0.0311881	0.0198578	0.305436	0.00342	0.0164378	0.208578	0.199911	0.0234111
	PI
	Rat number	Body weight	Heart weight	Liver weight	Right ventricel	Left ventricel	Testicular fat	Retraperitoneal fat	Muscle	Tibia length	BW/TL	HW/TL	LW/TL	HW/BW	LW/BW	HW/TL	LW/TL	RV/HW	LV/HW	TF/TL	RF/TL	M/TL
	1	370.52	0.886	9.902	-	-	-	-	-	41.5	8.92819	0.0213494	0.238602	0.00239123	0.0267246	0.0213494	0.238602	-	-	-	-	-
	2	364.58	0.872	9.241	-	-	-	-	-	40.5	9.00198	0.0215309	0.228173	0.00239179	0.025347	0.0215309	0.228173	-	-	-	-	-
	3	428.8	0.886	12.123	-	-	-	-	-	41	10.4585	0.0216098	0.295683	0.00206623	0.0282719	0.0216098	0.295683	-	-	-	-	-
	4	318.3	0.754	9.262	-	-	-	-	-	39	8.16154	0.0193333	0.237487	0.00236883	0.0290983	0.0193333	0.237487	-	-	-	-	-
	5	306.19	0.701	7.216	-	-	-	-	-	38	8.05763	0.0184474	0.189895	0.00228943	0.0235671	0.0184474	0.189895	-	-	-	-	-
	6	381.05	0.939	12.823	-	-	-	-	-	42	9.07262	0.0223571	0.30531	0.00246424	0.0336518	0.0223571	0.30531	-	-	-	-	-
	7	356.1	0.7609	10.6918	0.149	0.6119	5.172	3.4378	0.9326	42	8.47857	0.0181167	0.254567	0.00213676	0.0300247	0.0181167	0.254567	0.00354762	0.014569	0.123143	0.0818524	0.0222048
	8	371.4	0.6421	10.0952	0.1236	0.5185	6.349	4.7958	0.8679	42	8.84286	0.0152881	0.240362	0.00172886	0.0271815	0.0152881	0.240362	0.00294286	0.0123452	0.151167	0.114186	0.0206643
	9	367.7	0.8543	11.274	0.153	0.7013	7.4208	5.4618	0.9436	40	9.1925	0.0213575	0.28185	0.00232336	0.0306609	0.0213575	0.28185	0.003825	0.0175325	0.18552	0.136545	0.02359
	10	314.8	0.7648	8.8344	0.1517	0.6131	4.9831	2.2501	0.8061	42	7.49524	0.0182095	0.210343	0.00242948	0.0280635	0.0182095	0.210343	0.0036119	0.0145976	0.118645	0.0535738	0.0191929
	11	362.3	0.8068	11.8612	0.1463	0.6605	5.8831	3.0596	0.9514	41	8.83659	0.019678	0.289298	0.00222688	0.0327386	0.019678	0.289298	0.00356829	0.0161098	0.14349	0.0746244	0.0232049
	12	388	0.9096	10.932	0.1637	0.7459	6.2324	3.8255	0.9099	43	9.02326	0.0211535	0.254233	0.00234433	0.0281753	0.0211535	0.254233	0.00380698	0.0173465	0.14494	0.0889651	0.0211605
	PI+RSV
	Rat number	Body weight	Heart weight	Liver weight	Right ventricel	Left ventricel	Testicular fat	Retraperitoneal fat	Muscle	Tibia length	BW/TL	HW/TL	LW/TL	HW/BW	LW/BW	HW/TL	LW/TL	RV/HW	LV/HW	TF/TL	RF/TL	M/TL
	1	403.6	0.983	10.537	-	-	-	-	-	40.5	9.96543	0.0242716	0.260173	0.00243558	0.0261075	0.0242716	0.260173	-	-	-	-	-
	2	384.5	0.873	11.439	-	-	-	-	-	42	9.15476	0.0207857	0.272357	0.00227048	0.0297503	0.0207857	0.272357	-	-	-	-	-
	3	449.8	1.119	13.996	-	-	-	-	-	41.5	10.8386	0.0269639	0.337253	0.00248777	0.0311161	0.0269639	0.337253	-	-	-	-	-
	4	431.2	0.981	12.325	-	-	-	-	-	46.5	9.27312	0.0210968	0.265054	0.00227505	0.028583	0.0210968	0.265054	-	-	-	-	-
	5	401.02	1.114	15.39	-	-	-	-	-	45.5	8.81363	0.0244835	0.338242	0.00277792	0.0383771	0.0244835	0.338242	-	-	-	-	-
	6	304.6	0.773	7.729	-	-	-	-	-	46.5	6.55054	0.0166237	0.166215	0.00253775	0.0253743	0.0166237	0.166215	-	-	-	-	-
	7	374.6	0.8559	12.8517	0.1706	0.6853	8.9093	5.0209	0.9222	42	8.91905	0.0203786	0.305993	0.00228484	0.0343078	0.0203786	0.305993	0.0040619	0.0163167	0.212126	0.119545	0.0219571
	8	303.6	0.6421	10.0952	0.1236	0.5185	6.3496	4.7958	0.8679	40	7.59	0.0160525	0.25238	0.00211495	0.0332516	0.0160525	0.25238	0.00309	0.0129625	0.15874	0.119895	0.0216975
	9	458.9	1.0564	16.6996	0.176	0.8804	14.2081	11.3095	1.0449	42	10.9262	0.0251524	0.39761	0.00230203	0.0363905	0.0251524	0.39761	0.00419048	0.0209619	0.338288	0.269274	0.0248786
	10	383.8	0.8268	11.0442	0.1593	0.6675	7.6771	5.1982	0.978	43.5	8.82299	0.0190069	0.25389	0.00215425	0.0287759	0.0190069	0.25389	0.00366207	0.0153448	0.176485	0.119499	0.0224828
	11	361.6	0.6309	12.2031	0.1279	0.503	7.3245	5.6567	1.0091	41	8.81951	0.0153878	0.297637	0.00174475	0.0337475	0.0153878	0.297637	0.00311951	0.0122683	0.178646	0.137968	0.0246122
	12	313	0.832	9.7551	0.1525	0.6795	9.5767	7.8462	0.7277	40	7.825	0.0208	0.243878	0.00265815	0.0311665	0.0208	0.243878	0.0038125	0.0169875	0.239418	0.196155	0.0181925
	PI+ASP
	Rat number	Body weight	Heart weight	Liver weight	Right ventricel	Left ventricel	Testicular fat	Retraperitoneal fat	Muscle	Tibia length	BW/TL	HW/TL	LW/TL	HW/BW	LW/BW	HW/TL	LW/TL	RV/HW	LV/HW	TF/TL	RF/TL	M/TL
	1	424	0.968	14.634	-	-	-	-	-	42	10.0952	0.0230476	0.348429	0.00228302	0.0345142	0.0230476	0.348429	-	-	-	-	-
	2	480	1.149	15.912	-	-	-	-	-	46	10.4348	0.0249783	0.345913	0.00239375	0.03315	0.0249783	0.345913	-	-	-	-	-
	3	355.1	0.825	11.466	-	-	-	-	-	43.5	8.16322	0.0189655	0.263586	0.00232329	0.0322895	0.0189655	0.263586	-	-	-	-	-
	4	397.6	0.917	12.072	-	-	-	-	-	47.5	8.37053	0.0193053	0.254147	0.00230634	0.0303622	0.0193053	0.254147	-	-	-	-	-
	5	407.4	0.942	11.726	-	-	-	-	-	41	9.93659	0.0229756	0.286	0.00231222	0.0287825	0.0229756	0.286	-	-	-	-	-
	6	417.5	0.923	12.416	-	-	-	-	-	41.5	10.0602	0.022241	0.299181	0.00221078	0.0297389	0.022241	0.299181	-	-	-	-	-
	7	324.1	0.6886	8.5952	0.12	0.5686	5.092	3.5369	0.8743	41	7.90488	0.0167951	0.209639	0.00212465	0.0265202	0.0167951	0.209639	0.00292683	0.0138683	0.124195	0.0862659	0.0213244
	8	334.9	0.7376	10.7524	0.1231	0.6145	5.4057	3.1727	0.823	41	8.16829	0.0179902	0.262254	0.00220245	0.0321063	0.0179902	0.262254	0.00300244	0.0149878	0.131846	0.0773829	0.0200732
	9	325.4	0.9327	13.2481	0.1567	0.776	8.9205	5.5538	1.0072	43	7.56744	0.0216907	0.308095	0.00286632	0.0407133	0.0216907	0.308095	0.00364419	0.0180465	0.207453	0.129158	0.0234233
	10	414	0.7006	11.6112	0.1404	0.5602	11.5718	7.5318	0.8516	43	9.62791	0.016293	0.270028	0.00169227	0.0280464	0.016293	0.270028	0.00326512	0.0130279	0.269112	0.175158	0.0198047
	11	312.9	0.6893	10.2642	0.1202	0.5691	5.7165	4.6675	0.8356	41	7.63171	0.0168122	0.250346	0.00220294	0.0328035	0.0168122	0.250346	0.00293171	0.0138805	0.139427	0.113841	0.0203805
	12	316.4	0.7	9.1949	0.1324	0.5676	6.9027	5.534	0.8588	41	7.71707	0.0170732	0.224266	0.00221239	0.029061	0.0170732	0.224266	0.00322927	0.0138439	0.168359	0.134976	0.0209463
	PI+VITC
	Rat number	Body weight	Heart weight	Liver weight	Right ventricel	Left ventricel	Testicular fat	Retraperitoneal fat	Muscle	Tibia length	BW/TL	HW/TL	LW/TL	HW/BW	LW/BW	HW/TL	LW/TL	RV/HW	LV/HW	TF/TL	RF/TL	M/TL
	1	403.2	0.89	11.384	-	-	-	-	-	43	9.37674	0.0206977	0.264744	0.00220734	0.0282341	0.0206977	0.264744	-	-	-	-	-
	2	377.2	0.846	12.059	-	-	-	-	-	41.5	9.08916	0.0203855	0.290578	0.00224284	0.0319698	0.0203855	0.290578	-	-	-	-	-
	3	398.6	0.892	11.786	-	-	-	-	-	42	9.49048	0.0212381	0.280619	0.00223783	0.0295685	0.0212381	0.280619	-	-	-	-	-
	4	404.9	0.958	13.354	-	-	-	-	-	45.5	8.8989	0.0210549	0.293495	0.00236602	0.032981	0.0210549	0.293495	-	-	-	-	-
	5	446.8	1.077	14.33	-	-	-	-	-	43.5	10.2713	0.0247586	0.329425	0.00241047	0.0320725	0.0247586	0.329425	-	-	-	-	-
	6	436.1	0.996	14.268	-	-	-	-	-	43	10.1419	0.0231628	0.331814	0.00228388	0.0327173	0.0231628	0.331814	-	-	-	-	-
	7	357.5	0.7241	10.7656	0.1175	0.6066	6.9468	5.3341	0.868	41	8.71951	0.017661	0.262576	0.00202545	0.0301136	0.017661	0.262576	0.00286585	0.0147951	0.169434	0.1301	0.0211707
	8	377.5	0.7433	11.8658	0.1144	0.6289	7.1273	6.1117	0.9797	45	8.38889	0.0165178	0.263684	0.00196901	0.0314326	0.0165178	0.263684	0.00254222	0.0139756	0.158384	0.135816	0.0217711
	9	391.9	0.8509	11.6295	0.1609	0.69	7.7545	3.458	0.8839	42	9.33095	0.0202595	0.276893	0.00217122	0.0296747	0.0202595	0.276893	0.00383095	0.0164286	0.184631	0.0823333	0.0210452
	10	402.3	0.7006	11.6112	0.1404	0.5602	11.5718	7.5318	0.8516	42	9.57857	0.016681	0.276457	0.00174149	0.028862	0.016681	0.276457	0.00334286	0.0133381	0.275519	0.179329	0.0202762
	11	316.8	0.9094	10.9827	0.1773	0.7321	8.215	5.8656	0.8737	42	7.54286	0.0216524	0.261493	0.00287058	0.0346676	0.0216524	0.261493	0.00422143	0.017431	0.195595	0.139657	0.0208024
	12	409.6	0.9085	12.7807	0.166	0.7425	11.7698	9.3528	0.9918	44	9.30909	0.0206477	0.29047	0.00221802	0.0312029	0.0206477	0.29047	0.00377273	0.016875	0.267495	0.212564	0.0225409

## Sheet: Mean ± SEM
		Control	Vehicle Control	PI	PI+RSV	PI+ASP	PI+VITC
	RV Weight	0.19 ± 0.01	0.17 ± 0.01	0.13 ± 0.01	0.15 ± 0.01	0.15 ± 0.01	0.15 ± 0.01
	LV Weight	0.72 ± 0.04	0.75 ± 0.03	0.61 ± 0.03	0.64 ± 0.03	0.66 ± 0.06	0.66 ± 0.03
	Tibia Length	42.08 ± 0.5	42.83 ± 0.26	42.63 ± 0.62	41 ± 0.41	42.58 ± 0.69	42.88 ± 0.4
	Liver Weight	11.83 ± 0.64	11.86 ± 0.49	11.82 ± 0.6	10.35 ± 0.46	12.01 ± 0.72	12.23 ± 0.35
	T Fat Pad	8.42 ± 1.05	8.42 ± 0.49	7.27 ± 1.03	6.01 ± 0.36	9.01 ± 1.14	8.9 ± 0.9
	RP Fat Pad	5.03 ± 0.89	5.67 ± 0.83	5.00 ± 0.65	3.81 ± 0.48	6.64 ± 1.04	6.28 ± 0.82
	RV/TL	0.004 ± 0.0003	0.004 ± 0.0003	0.003 ± 0.0002	0.004 ± 0.0002	0.004 ± 0.0002	0.004 ± 0.0002
	LV/TL	0.017 ± 0.0007	0.017 ± 0.0007	0.015 ± 0.0007	0.016 ± 0.0009	0.016 ± 0.0013	0.015 ± 0.0007
